# Supplementary material
Source: publisher site journal article supplement (https://www.dovepress.com/article/supplementary_file/526902/Combined%20file%20for%20supplementary%20figures-1%20to%204_1.docx)
Supplement: Supplementary file 1 [file Combined%20file%20for%20supplementary%20figures-1%20to%204_1.docx]

**Supplementary Figures:**


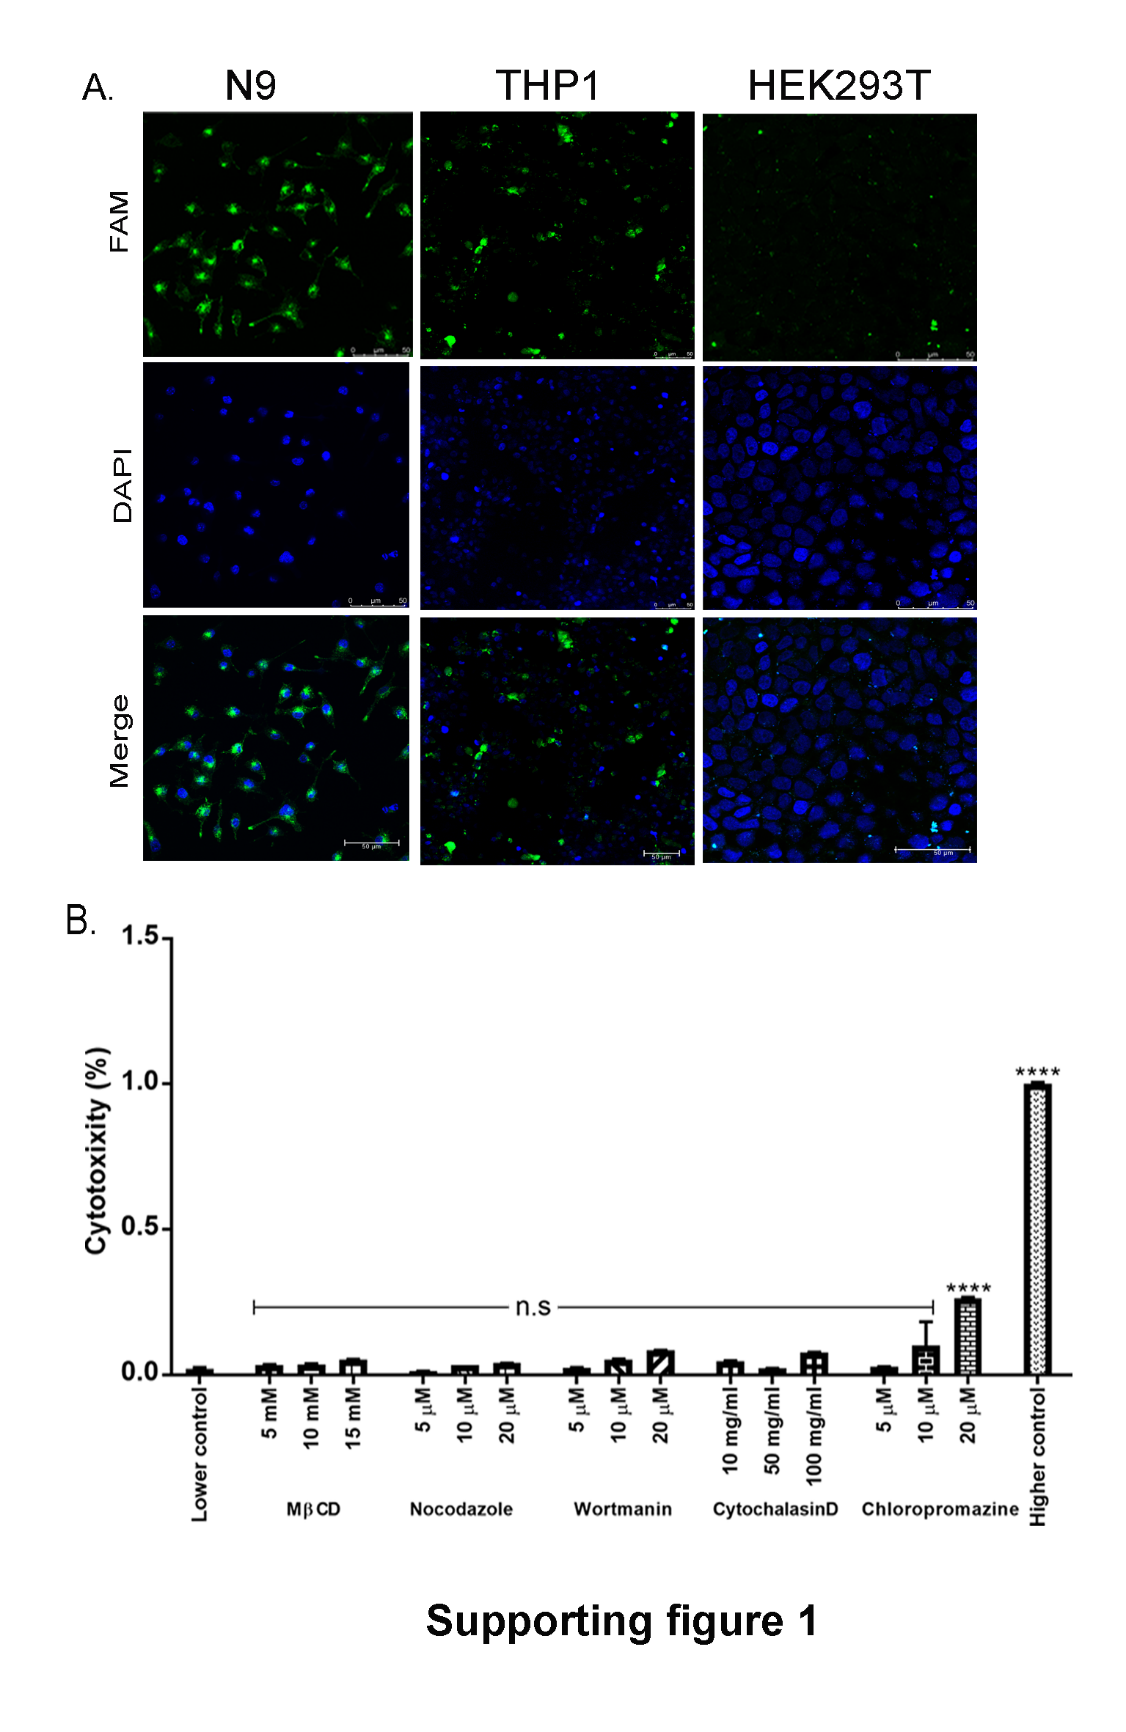


**Supporting Figure 1:** (A) Uptake of TB4 peptide by various cell types. Microglial N9/ THP1/ HEK293 cells were treated with 100 μM of FAM-TB4 for 2 hours, followed by processing the cells for fluorescent microscopy. The cells were imaged using a laser confocal microscope at 63X. Scale bar, 50 µm. The image represents 10 different fields captured from cells treated with the peptide. The green fluorescence inside the cells shows the internalised peptides and the nuclei stained with DAPI (blue). (B) LDH assay to determine the cytotoxicity of various uptake inhibitors. RAW264.7 cells were treated with increasing concentrations of inhibitors for 5 hours, followed by quantifying the LDH released into the culture supernatants. The data are presented as the mean SEM from at least three independent experiments (n.s, P> 0.05; ****, P < 0.0001)


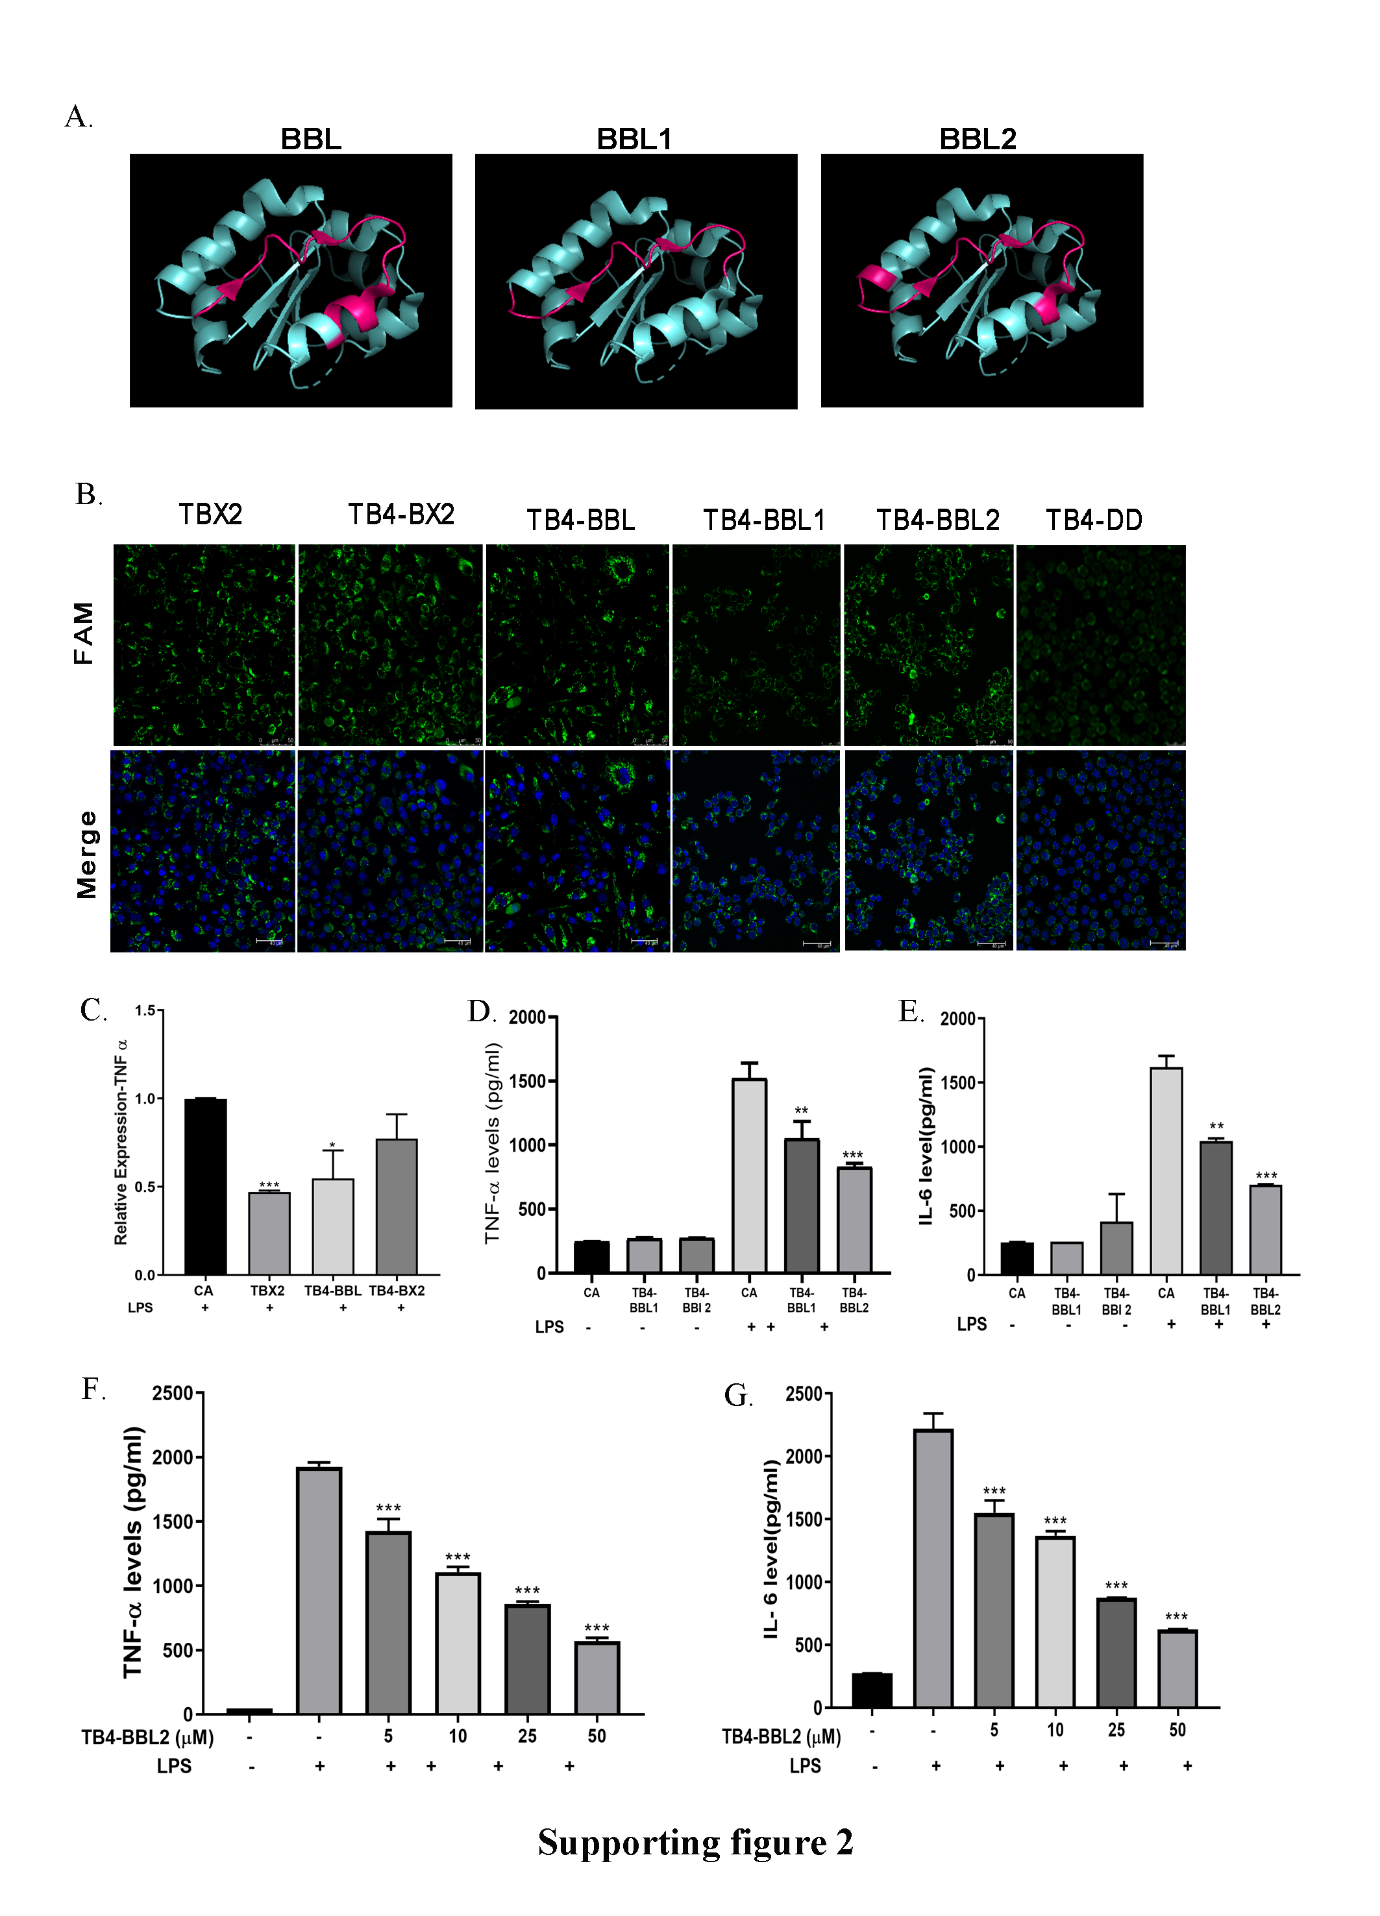


**Supporting Figure 2:** (A) Ribbon diagram displaying the BBL, BBL1, and BBL2 peptide (pink) in the TIR (cyan) domain of TcpB. (B) Internalization of TcpB- or TIRAP-derived anti-inflammatory peptides labeled with FAM. RAW264.7 cells were treated with indicated peptides for 2 hours, followed by processing the cells for fluorescent microscopy. The green fluorescence inside the cells indicates the internalised peptides and the nuclei stained with DAPI (blue). The cells were imaged using a laser confocal microscope at 63X. Scale bar, 40 µm. The image represents 10 different fields captured from cells treated with peptides. (C-E) The cell-permeable chimeric peptides from TcpB or TIRAP suppress LPS-induced production of TNF-α. RAW264.7 cells were treated with the indicated peptides, followed by the induction of proinflammatory cytokines by LPS. The levels of TNF-α and IL-6 in the LPS-induced cells were quantified by q-RT-PCR (C) and ELISA (D-E). (F-G) TB4-BBL2 suppresses the production of TNF-α and IL-6 in bovine macrophages. The data are presented as the mean SEM from at least three independent experiments (n.s, P> 0.05; *, P< 0.05; **, P< 0.01; ***, P < 0.001). CA: Cell alone
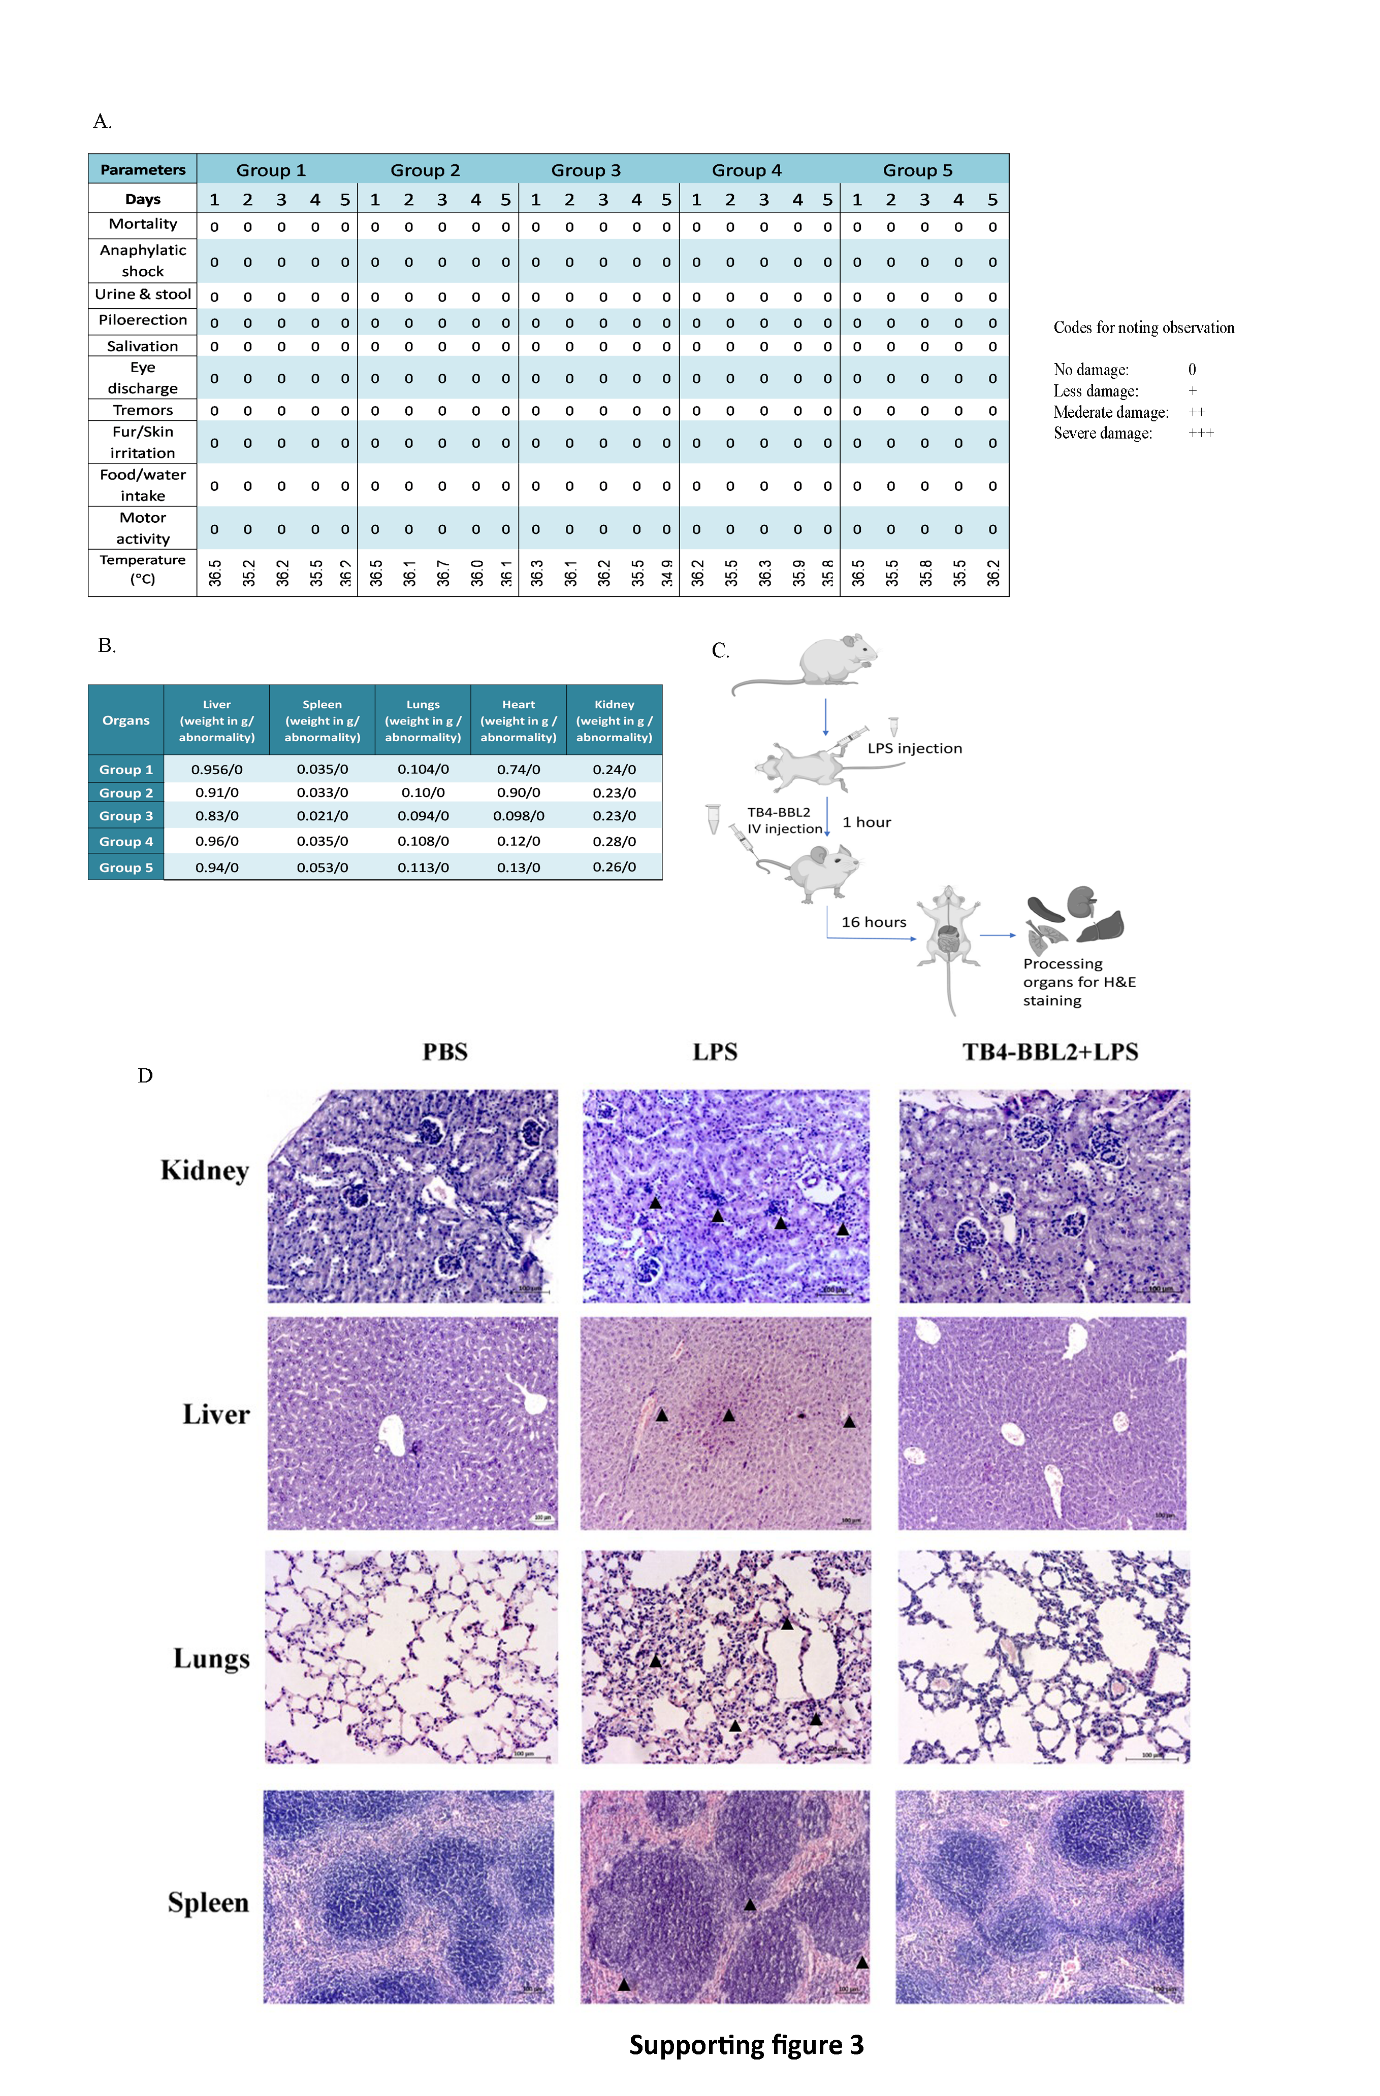
**Supporting Figure 3:** (A) TB4-BBL2 does not induce toxicity in mice. Mice were treated with increasing concentrations (5, 10, 20, and 40 mg/kg) of TB4-BBL2 peptide, and the toxicity parameters were evaluated for 5 days. (B) The weight of organs of mice treated with increasing doses of TB4-BBL2 peptide. (C) Pictographic representation of the experimental design for studying the effect of TB4-BBL2 on tissue damage. (D) Immunohistochemistry of organs from healthy or endotoxemic mice untreated or treated with TB4-BBL2 peptide. The induction of endotoxemia by LPS administration displayed tissue injury, where the infiltration of inflammatory cells and necrotic sites are indicated by black arrows. The mice treated with TB4-BBL2 displayed minimal damage to the organs. Scale bar: 100 μM.


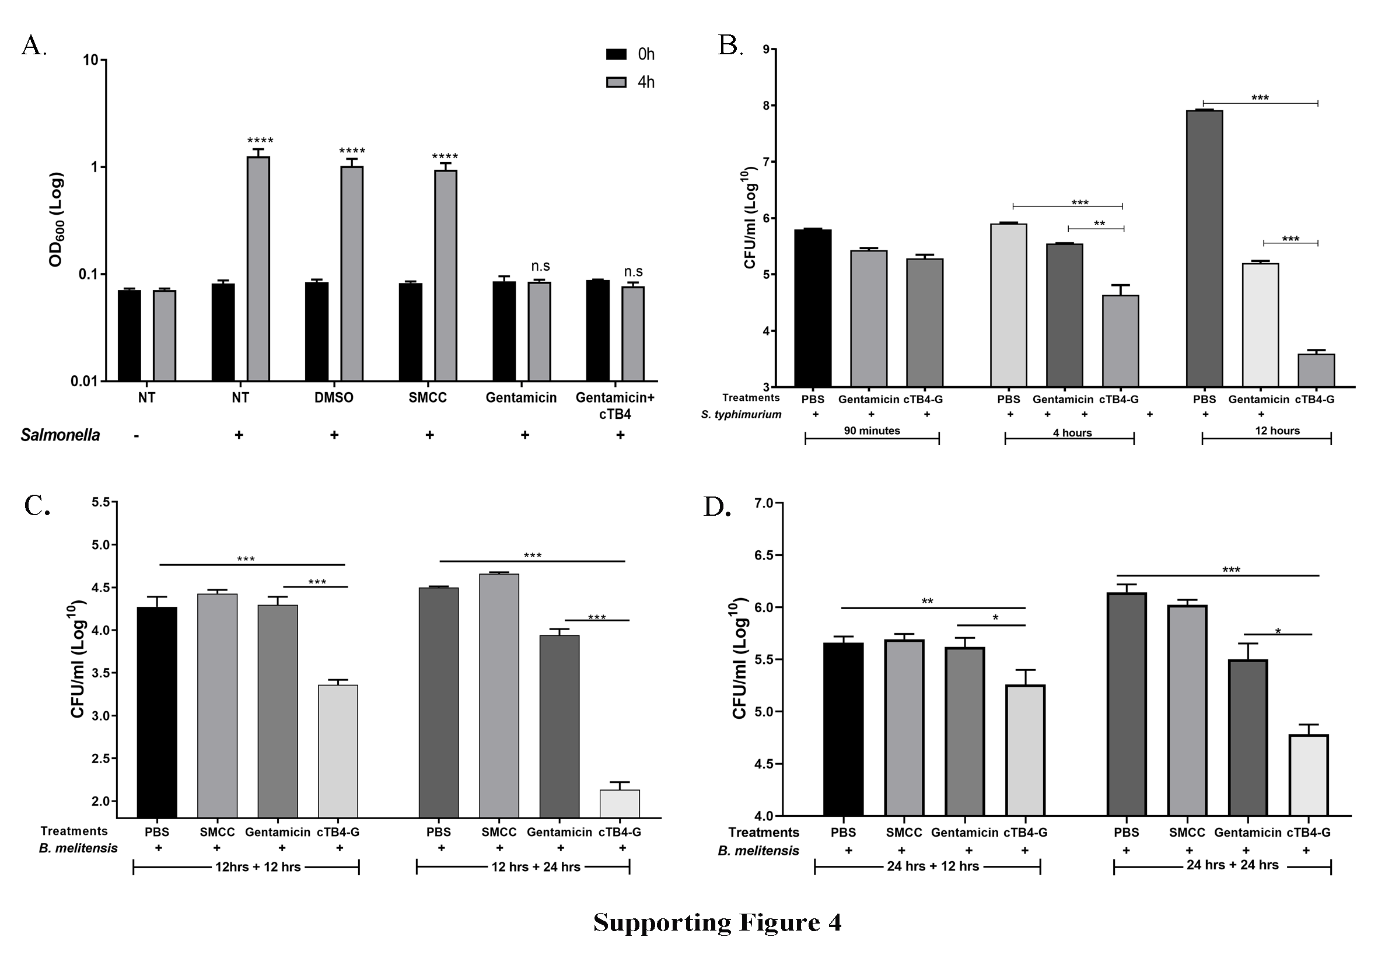


**Supporting information 4:** (A) Gentamicin efficiency upon conjugation with cTB4 was evaluated by treating cultures on *Salmonella* with DMSO, SMCC, Gentamicin and cTB4-Gentamicin conjugate. We measured the OD600 after 4 hours. (B) The bactericidal efficiency of cTB4-G was evaluated at different time points in *Salmonella*-infected cells treated with cTB4-G. With increasing time points, there was enhanced clearance of intracellular bacteria. (C-D) B. melitensis infected RAW264.7 were maintained for 12 hours (G) or 24 hours (H) in 3 µg/ml Gentamicin supplemented growth media, followed by treatment with controls and cTB4-Gentamicin. The CFU was enumerated 12 or 24 hours post-treatment. The data are presented as the mean SEM from at least two independent experiments (n.s, P> 0.05; *, P< 0.05; **, P< 0.01; ***, P < 0.001; ****, P < 0.0001).
